# Supplementary material
Source: Springer Nature journal article supplement (https://www.springermedizin.de/resource/supplementary/12884_2013_976_MOESM1_ESM.pdf/9459360)
Supplement: MOESM1 [file 9459360]

**Table 1: Factors associated with four or more antenatal care visits in Nepal**

| <b>Study variables<sup>1</sup></b>                       | <b>Total number of women</b> | <b>Number (%) of women who had 4 or more ANC visits (%)</b> | <b>Unadjusted OR (95% CI)</b> | <b>P</b> | <b>Adjusted OR (95% CI)</b> | <b>P</b> |
|----------------------------------------------------------|------------------------------|-------------------------------------------------------------|-------------------------------|----------|-----------------------------|----------|
| <b>Women's age at birth of child in years (Mean, SD)</b> | 25.3                         | 24.3 (4.87)                                                 |                               | <0.001   |                             | 0.021    |
| For every ten years increase in age of women             | Linear                       |                                                             | 0.66 (0.57 to 0.77)           | <0.001   | 1.34 (1.05 to 1.72)         |          |
|                                                          | Quadratic                    |                                                             | 0.63 (0.52 to 0.76)           | <0.001   |                             |          |
| <b>Women's education</b>                                 |                              |                                                             |                               | <0.001   |                             | <0.001   |
| No education                                             | 1822                         | 523 (28.7)                                                  | 1 (referent category)         |          | 1 (referent category)       |          |
| Primary education                                        | 835                          | 431 (51.6)                                                  | 2.65 (2.15 to 3.26)           |          | 1.72 (1.38 to 2.14)         |          |
| Secondary education                                      | 1229                         | 881 (71.7)                                                  | 6.28 (5.00 to 7.89)           |          | 2.50 (1.94 to 3.22)         |          |
| Tertiary education                                       | 263                          | 243 (92.6)                                                  | 30.86 (15.67 to 60.77)        |          | 7.11 (3.28 to 15.44)        |          |
| <b>Women's work status in the past 12 months</b>         |                              |                                                             |                               | 0.001    | -                           | -        |

|                                                                |      |             |                       |        |                       |        |
|----------------------------------------------------------------|------|-------------|-----------------------|--------|-----------------------|--------|
| Didn't work in paid employment                                 | 1150 | 652 (56.7 ) | 1 (referent category) |        |                       |        |
| Worked in paid employment                                      | 2999 | 1426 (47.5) | 0.69 (0.56 to 0.86)   |        |                       |        |
| <b>Wealth quintile to which the women's household belonged</b> |      |             |                       | <0.001 |                       | <0.001 |
| Poorest                                                        | 979  | 277 (28.3)  | 1 (referent category) |        | 1 (referent category) |        |
| Poorer                                                         | 899  | 352 (39.1)  | 1.63 (1.26 to 2.11)   |        | 1.17 (0.88 to 1.56)   |        |
| Middle                                                         | 873  | 419 (48.0)  | 2.35 (1.71 to 3.21)   |        | 1.28 (0.90 to 1.83)   |        |
| Richer                                                         | 748  | 487 (65.1)  | 4.74 (3.44 to 6.54)   |        | 1.87 (1.28 to 2.74)   |        |
| Richest                                                        | 649  | 543 (83.7)  | 13.03 (9.28 to 18.30) |        | 3.00 (1.95 to 4.60)   |        |
| <b>Religion</b>                                                |      |             |                       | 0.023  | -                     | -      |
| Hindu                                                          | 3444 | 1787 (51.9) | 1 (referent category) |        |                       |        |
| Buddhist                                                       | 360  | 158 (43.9)  | 0.73 (0.52 to 1.02)   |        |                       |        |
| Muslim                                                         | 235  | 82 (34.9)   | 0.50 (0.30 to 0.82)   |        |                       |        |
| Kirat                                                          | 58   | 29 (50.1)   | 0.93 (0.45 to 1.92)   |        |                       |        |

|                                                                                                                                                                            |      |             |                       |        |                       |       |
|----------------------------------------------------------------------------------------------------------------------------------------------------------------------------|------|-------------|-----------------------|--------|-----------------------|-------|
| Christian                                                                                                                                                                  | 51   | 22 (43.4)   | 0.71 (0.37 to 1.36)   |        |                       |       |
| <b>Woman's smoking status</b>                                                                                                                                              |      |             |                       | <0.001 |                       | 0.036 |
| Smokers                                                                                                                                                                    | 511  | 133 (26.1)  | 1 (referent category) |        | 1 (referent category) |       |
| Non-smokers                                                                                                                                                                | 3638 | 1945 (53.5) | 3.26 (2.43 to 4.38)   |        | 1.40 (1.02 to 1.92)   |       |
| <b>Whether woman participated in at least one of the three decisions regarding their own health care, major household purchases and visit to their family or relatives</b> |      |             |                       | 0.005  |                       | 0.005 |
| No                                                                                                                                                                         | 2473 | 1134 (45.9) | 1 (referent category) |        | 1 (referent category) |       |
| Yes                                                                                                                                                                        | 1675 | 943 (56.3)  | 1.52 (1.27 to 1.82)   |        | 1.32 (1.09 to 1.60)   |       |
| <b>Whether woman was exposed to any of the three general media (radio, television or newspaper/magazines) at least once a week</b>                                         |      |             |                       | 0.008  | -                     | -     |
| No                                                                                                                                                                         | 1641 | 754 (46.0)  | 1 (referent category) |        |                       |       |
| Yes                                                                                                                                                                        | 2507 | 1324 (52.8) | 1.32 (1.08 to 1.61)   |        |                       |       |
| <b>Women's parity (Mean, SD)</b>                                                                                                                                           | 2.6  | 2.1 (1.29)  |                       | <0.001 |                       | <.001 |
| For each unit increase in live birth                                                                                                                                       |      |             | 0.65 (0.61 to 0.70)   |        | 0.78 (0.71 to 0.86)   |       |
| <b>Whether pregnancy wanted at the time</b>                                                                                                                                |      |             | 0.71 (0.62 to 0.81)   | 0.001  | -                     | -     |

|                                          |      |             |                       |       |   |   |
|------------------------------------------|------|-------------|-----------------------|-------|---|---|
| Wanted pregnancy                         | 3017 | 1582 (52.4) | 1 (referent category) |       |   |   |
| Unwanted pregnancy                       | 1131 | 496 (43.8)  | 0.71 (0.58 to 0.86)   |       |   |   |
| <b>History of previous pregnancies</b>   |      |             |                       | 0.011 | - | - |
| No complications in previous pregnancies | 3484 | 1777 (51.0) | 1 (referent category) |       |   |   |
| Complications in previous pregnancies    | 664  | 301 (45.3)  | 0.79 (0.67 to 0.95)   |       |   |   |
| <b>Use of modern family planning</b>     |      |             |                       | 0.717 | - | - |
| No                                       | 2781 | 1385 (49.8) | 1 (referent category) |       |   |   |
| Yes                                      | 1367 | 693 (50.7)  | 1.04 (0.86 to 1.25)   |       |   |   |
| <b>Ecological zones of residence</b>     |      |             |                       | 0.179 | - | - |
| Terai                                    | 2174 | 1108 (50.9) | 1 (referent category) |       |   |   |
| Hill                                     | 1669 | 840 (50.3)  | 0.98 (0.70 to 1.36)   |       |   |   |

|                                         |      |             |                       |        |                       |       |
|-----------------------------------------|------|-------------|-----------------------|--------|-----------------------|-------|
| Mountain                                | 306  | 130 (42.7)  | 0.72 (0.49 to 1.05)   |        |                       |       |
| <b>Residence</b>                        |      |             |                       | <0.001 | -                     | -     |
| Rural                                   | 3730 | 1778 (47.7) | 1 (referent category) |        |                       |       |
| Urban                                   | 418  | 300 (71.8)  | 2.79 (2.13 to 3.65)   |        |                       |       |
| <b>Husband's education</b>              |      |             |                       | <0.001 |                       | 0.010 |
| No education                            | 872  | 200 (23.0)  | 1 (referent category) |        | 1 (referent category) |       |
| Primary                                 | 984  | 395 (40.2)  | 2.26 (1.67 to 3.04)   |        | 1.55 (1.12 to 2.13)   |       |
| Secondary                               | 1809 | 1104 (61.1) | 5.26 (3.94 to 7.01)   |        | 1.81 (1.31 to 2.51)   |       |
| Tertiary                                | 461  | 367 (79.7)  | 13.15 (8.89 to 19.45) |        | 1.60 (0.98 to 2.61)   |       |
| Don't know                              | 22   | 10 (45.0)   | 2.75 (0.84 to 8.95)   |        | 2.54 (0.74 to 8.74)   |       |
| <b>Husband's occupation</b>             |      |             |                       | <0.001 |                       | 0.002 |
| Agricultural (self-employed & employee) | 1005 | 334 (33.2)  | 1 (referent category) |        | 1 (referent category) |       |
| Professional/technical/managerial       | 210  | 173 (82.3)  | 9.34 (5.88 to 14.84)  |        | 2.13 (1.27 to 3.58)   |       |

|                  |     |            |                     |  |                     |  |
|------------------|-----|------------|---------------------|--|---------------------|--|
| Clerical         | 487 | 265 (54.4) | 2.40 (1.59 to 3.63) |  | 1.44 (0.96 to 2.14) |  |
| Services         | 991 | 661 (66.7) | 4.02 (3.12 to 5.18) |  | 1.76 (1.29 to 2.39) |  |
| Skilled manual   | 680 | 312 (45.9) | 1.70 (1.34 to 2.18) |  | 1.36 (1.02 to 1.82) |  |
| Unskilled manual | 635 | 266 (42.0) | 1.45 (1.08 to 1.96) |  | 1.47 (1.05 to 2.05) |  |
| Other            | 140 | 67 (47.4)  | 1.81 (0.97 to 3.37) |  | 0.83 (0.42 to 1.63) |  |
